# Supplementary material for: Phosducin influences sympathetic activity and prevents stress-induced hypertension in humans and mice
Source: JCI journal article supplement (doi:10.1172/jci38433), 2009-11-23
Supplement: sd1 [file 1]

## **Supplemental Data**

### **Phosducin Influences Sympathetic Activity and Prevents Stress-Induced Hypertension in Humans and Mice**

Nadine Beetz, Michael D. Harrison, Marc Brede, Xiangang Zong, Michal J. Urbanski, Anika Sietmann, Jennifer Kaufling, Michel Barrot, Mathias Seeliger, Maria Augusta Vieira-Coelho, Pavel Hamet, Daniel Gaudet, Ondrej Seda, Johanne Tremblay, Theodore A. Kotchen, Mary Kaldunski, Rolf Nüsing, Bela Szabo, Howard J. Jacob, Allen W. Cowley Jr., Martin Biel, Monika Stoll, Martin J. Lohse, Ulrich Broeckel, Lutz Hein

**Supplemental Figure 1 | Overview over the phenotypic characterization of regulatory circuits in the sympathetic nervous system in phosducin-deficient mice.**

## Supplemental Figure 1

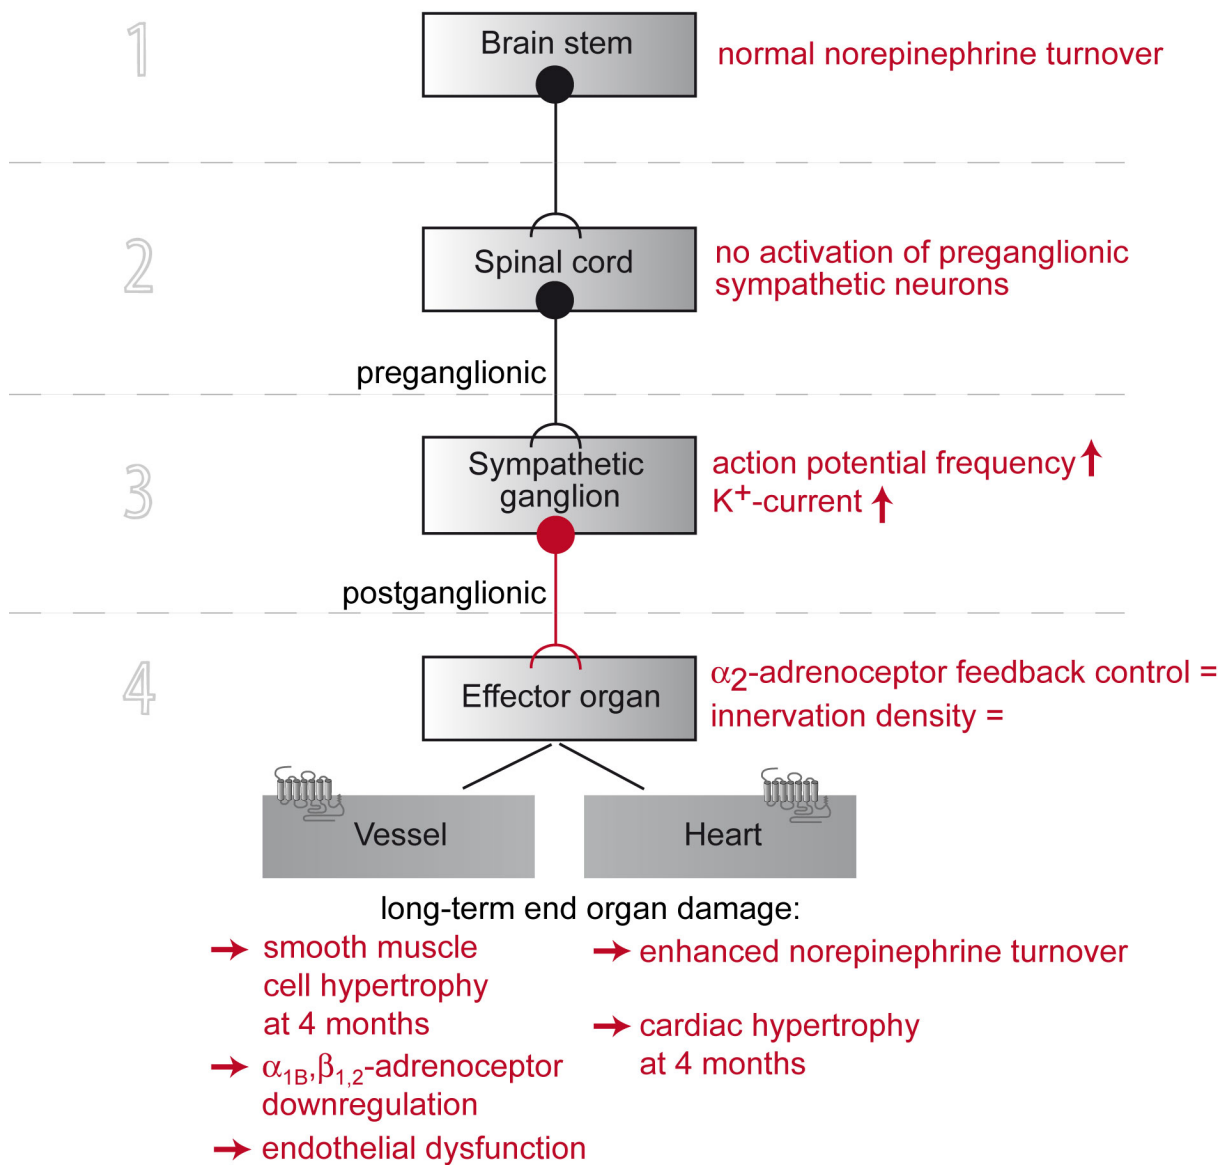

**Supplemental Figure 2 | cFos immunostaining to assess activation of preganglionic sympathetic neurons in the thoracic spinal cord.** **(A)** Choline acetyltransferase (ChAT) immunostaining in *Pdc*<sup>+/+</sup> and *Pdc*<sup>-/-</sup> mice. The deletion of *Pdc* did not affect the organization of the spinal cholinergic system. The white arrow indicates the intermediolateral column (IML) location. **(B)** cFos, marker of activity, was detected by immunofluorescence in the IML cholinergic neurons of both *Pdc*<sup>+/+</sup> and *Pdc*<sup>-/-</sup> mice. **(C)** The proportion of IML cholinergic neurons expressing cFos did not differ between *Pdc*<sup>+/+</sup> and *Pdc*<sup>-/-</sup> mice (n=6 per genotype, *P*=0.78).

Supplemental Figure 2

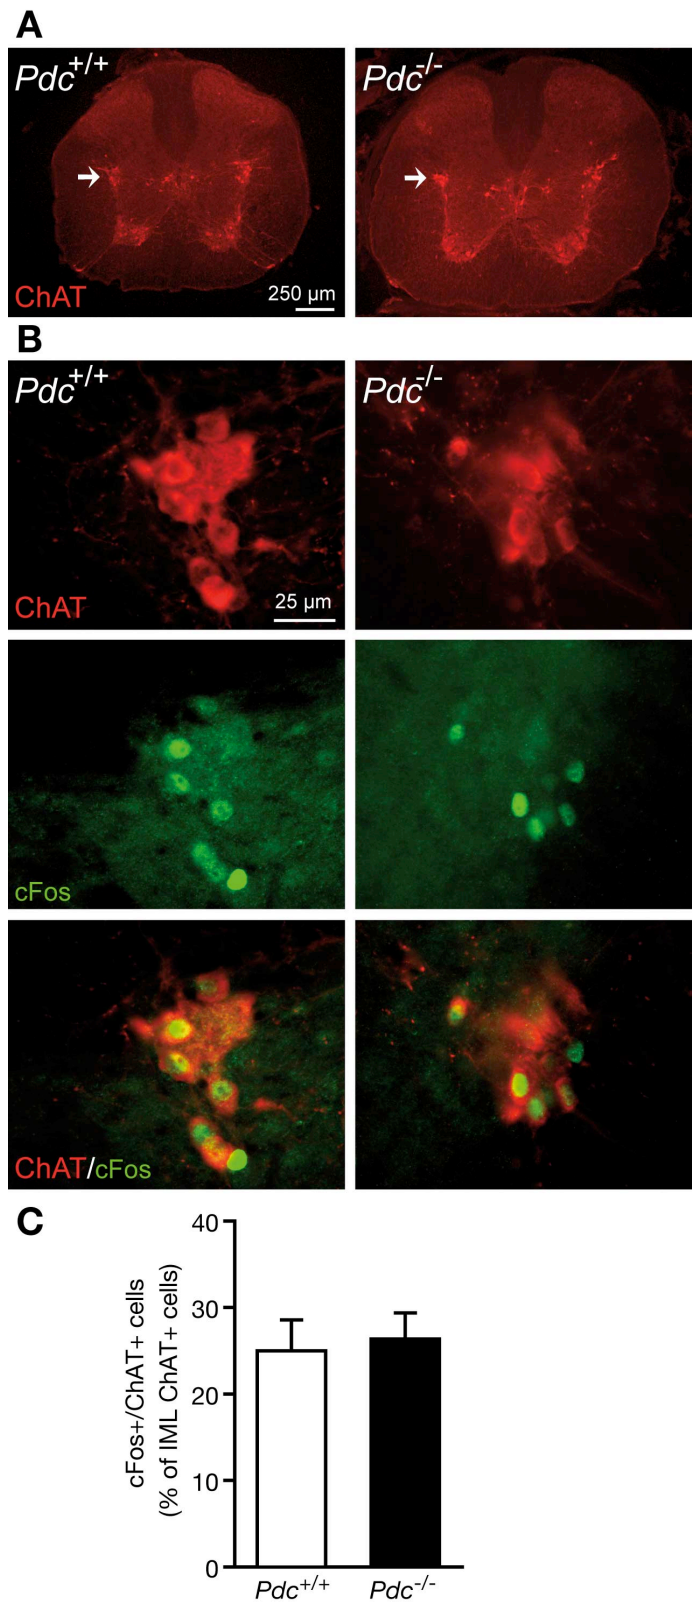

**Supplemental Figure 3 | Pupil diameter in wild-type and *Pdc*-deficient mice.** Pupil size was determined in awake *Pdc*<sup>+/+</sup> (**A-C**) and *Pdc*<sup>-/-</sup> (**D-F**) mice by infrared confocal scanning-laser ophthalmoscopy after over-night dark adaptation ("pre flash"), immediately after a brief white light flash ("flash") and 30 s after the light flash ("post flash"). (**G-I**) Mean values of pupillary / corneal diameter in 8 *Pdc*<sup>+/+</sup> and 8 *Pdc*<sup>-/-</sup> mice (\*  $P < 0.05$ , \*\*\*  $P < 0.001$ ).

Supplemental Figure 3

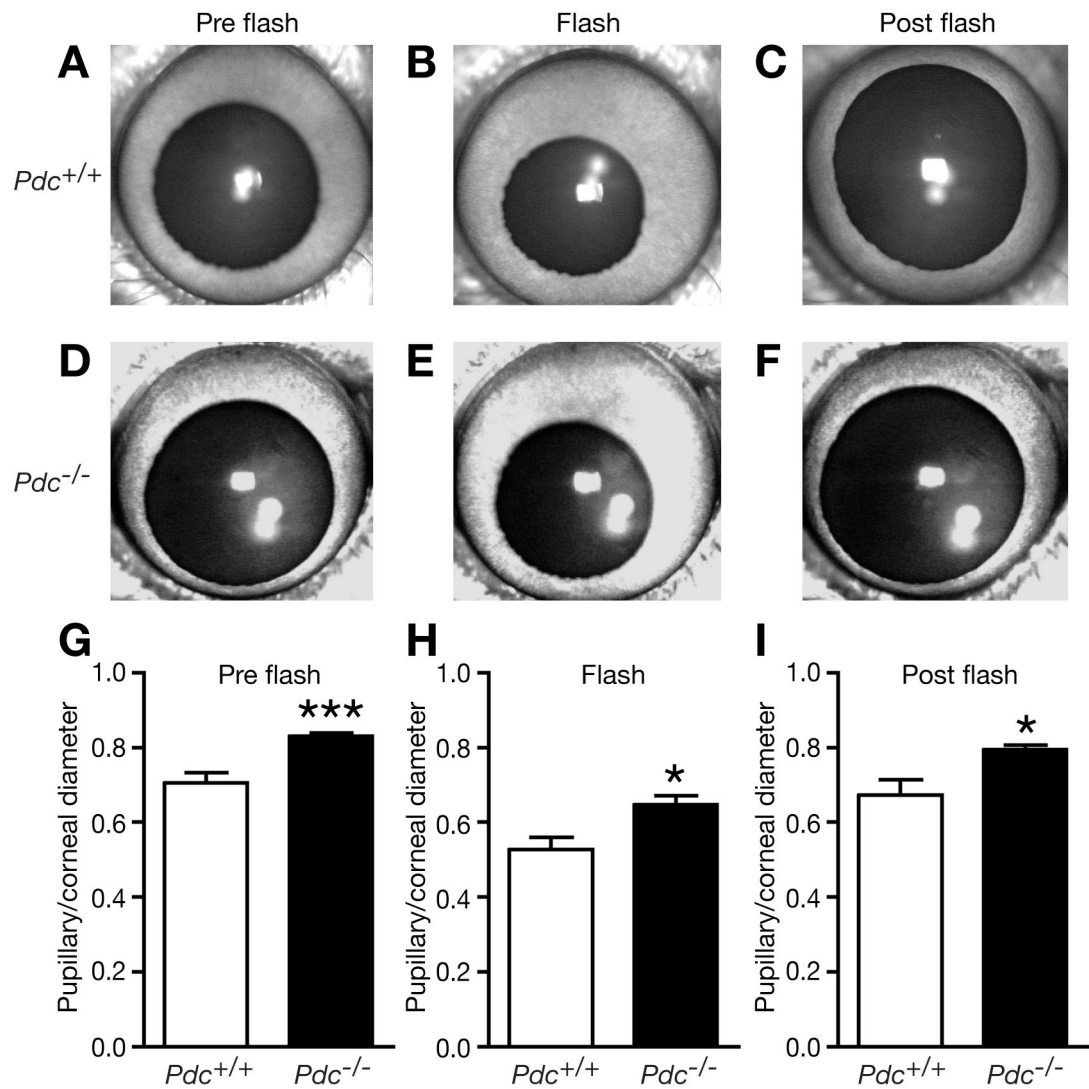

**Supplemental Figure 4 | Cardiovascular function in 4-6 month old phosducin-deficient mice.** (A-G) Hypertrophy and altered function in segments of the femoral and iliac artery isolated from 4 months old phosducin-deficient mice. (A-C) Longitudinal sections through the femoral artery of wild-type (A) and *Pdc*<sup>-/-</sup> mice (B) revealed an increased media thickness as well as increased smooth muscle cells cross sectional areas (C, n=6, \*\*\* *P*<0.0001). (D) The vasoconstrictory response to  $\alpha_1$ -adrenergic receptor activation by phenylephrine was significantly enhanced in *Pdc*<sup>-/-</sup> iliac artery segments (n=6-10, \*\*\* *P*<0.001). (E) Endothelium-dependent relaxation induced by the  $\alpha_2$ -adrenoceptor agonist medetomidine was diminished in *Pdc*<sup>-/-</sup> as compared with *Pdc*<sup>+/-</sup> vessels (n=8-10, \*\*\* *P*<0.001). (F) Vasorelaxation of precontracted vessels by sodium nitroprusside was unaltered in *Pdc*<sup>-/-</sup> vessels (n=6, *P*>0.05). (G) In aortae of mice aged 4 months,  $\alpha$ - and  $\beta$ -adrenoceptors were downregulated as detected by quantitative real-time PCR (n=7-8, \* *P*<0.05, \*\* *P*<0.01). Abbreviations: *Adrb1*,  $\beta_1$ -adrenoceptor; *Adrb2*,  $\beta_2$ -adrenoceptor; *Adra1b*,  $\alpha_{1B}$ -adrenoceptor. (H and I) Cardiac hypertrophy and  $\beta$ -MHC regulation. (H) In animals aged 4 months, analysis of cardiac morphology revealed significant cardiac hypertrophy as expressed by increased heart weight to tibia length ratio (n=7-8; \* *P*<0.05). (I) The  $\beta$ -isoform of myosin heavy chain was found to be upregulated in quantitative real-time PCR experiments of whole ventricles (\* *P*<0.05; n=7-8). Abbreviation: *Myh7*,  $\beta$ -myosin heavy chain. Bar 1 mm.

Supplemental Figure 4

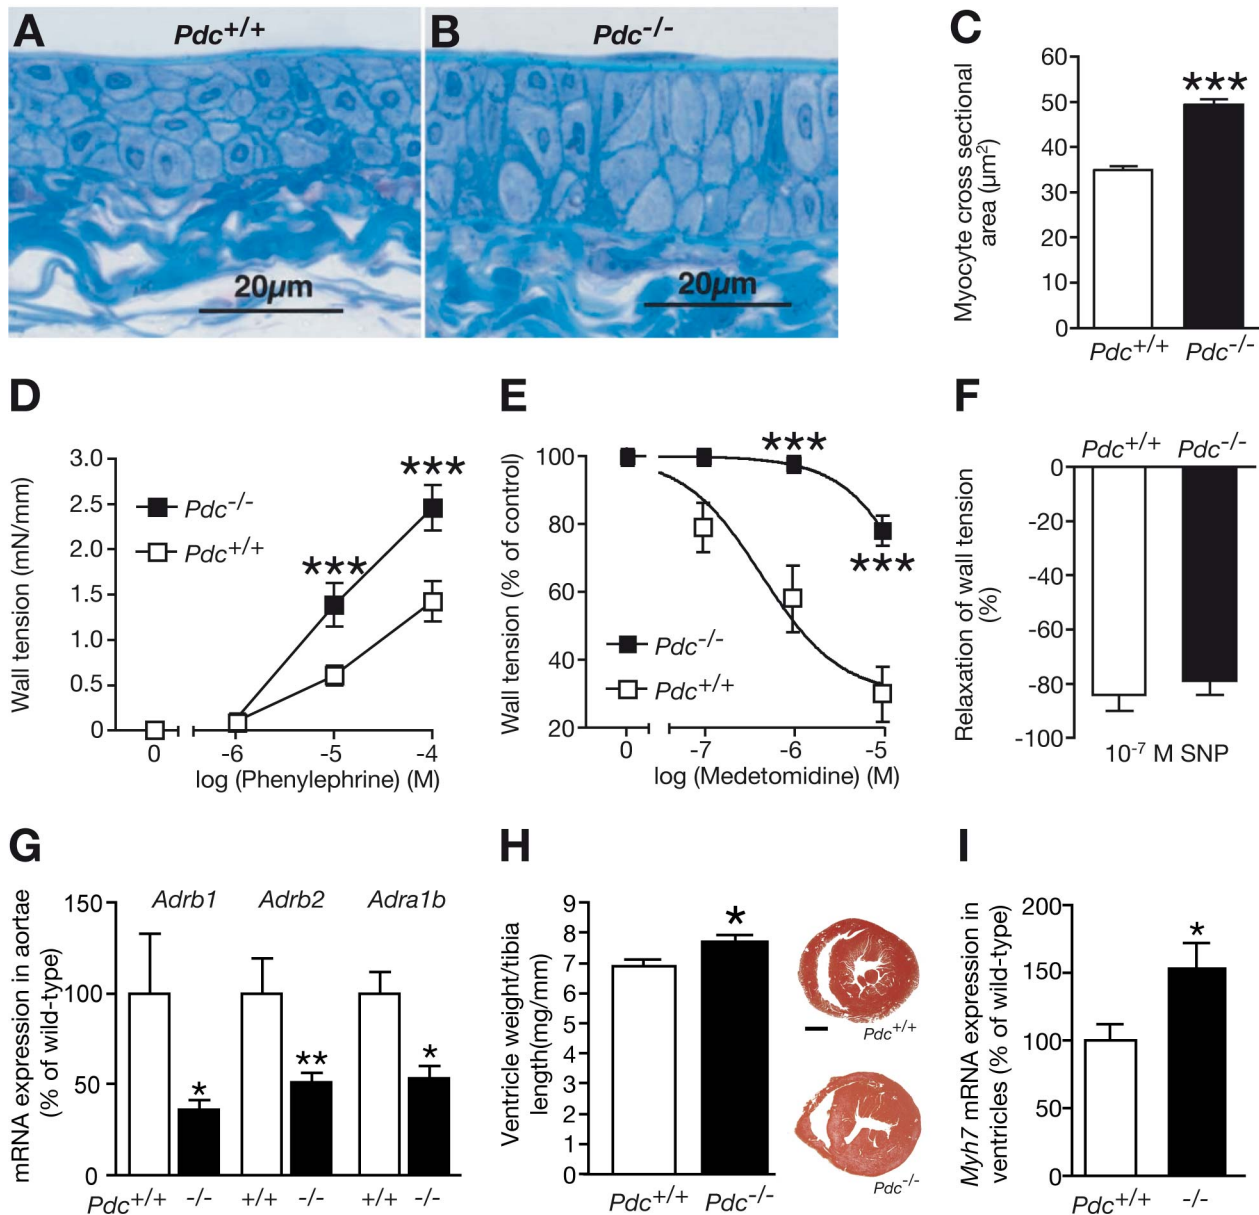

**Supplemental Table 1 | Blood pressure after implantation of telemetric pressure transducers during isoflurane anesthesia.** Maximal arterial blood pressure was determined during the first 12 hours after implantation of a telemetric blood pressure transducer into the left carotid artery (n=6-8 per genotype).

|                                       | Genotype                                                                        | Systolic pressure<br>(mm Hg) | Diastolic pressure<br>(mm Hg) |
|---------------------------------------|---------------------------------------------------------------------------------|------------------------------|-------------------------------|
| C57BL6/J                              | <i>Pdc</i> <sup>+/+</sup>                                                       | 133.8 ± 4.2                  | 100.5 ± 3.0                   |
|                                       | <i>Pdc</i> <sup>-/-</sup>                                                       | 188.6 ± 7.8                  | 142.8 ± 3.6                   |
|                                       | t-test                                                                          | <b><i>P</i>&lt;0.001</b>     | <b><i>P</i>&lt;0.001</b>      |
| C3H/HeN                               | <i>Pdc</i> <sup>+/+</sup>                                                       | 123.4 ± 3.3                  | 89.0 ± 4.6                    |
|                                       | <i>Pdc</i> <sup>-/-</sup>                                                       | 165.4 ± 4.1                  | 124.1 ± 3.0                   |
|                                       | t-test                                                                          | <b><i>P</i>&lt;0.001</b>     | <b><i>P</i>&lt;0.001</b>      |
| „long day“<br>light 20h/dark 4h       | <i>Pdc</i> <sup>+/+</sup>                                                       | 133.3 ± 7.6                  | 98.3 ± 5.1                    |
|                                       | <i>Pdc</i> <sup>-/-</sup>                                                       | 170.4 ± 11.9                 | 127.2 ± 8.7                   |
|                                       | t-test                                                                          | <b><i>P</i>&lt;0.05</b>      | <b><i>P</i>&lt;0.05</b>       |
| „long night“<br>light 4h/dark 20h     | <i>Pdc</i> <sup>+/+</sup>                                                       | 136.0 ± 7.2                  | 103.4 ± 6.2                   |
|                                       | <i>Pdc</i> <sup>-/-</sup>                                                       | 176.2 ± 6.4                  | 138.3 ± 4.5                   |
|                                       | t-test                                                                          | <b><i>P</i>&lt;0.01</b>      | <b><i>P</i>&lt;0.01</b>       |
| MT <sub>1a</sub> /MT <sub>1b</sub> KO | <i>MT1a</i> <sup>+/+</sup> <i>MT1b</i> <sup>+/+</sup> <i>Pdc</i> <sup>+/+</sup> | 124.6 ± 13.3                 | 97.7 ± 5.2                    |
|                                       | <i>MT1a</i> <sup>-/-</sup> <i>MT1b</i> <sup>-/-</sup> <i>Pdc</i> <sup>+/+</sup> | 117.2 ± 5.2                  | 87.9 ± 2.7                    |
|                                       | t-test                                                                          | <i>P</i> =0.623              | <i>P</i> =0.144               |

**Supplemental Table 2 | Brain and brain stem levels of norepinephrine and its metabolites in *Pdc*<sup>+/+</sup> and *Pdc*<sup>-/-</sup> mice.** Norepinephrine, dihydroxyphenylglycol (DHPG) and normetanephrine (NMN) did not differ between genotypes ( $P>0.05$ , n=7-12 per genotype).

|             | Catecholamine   | Genotype                  |                           |
|-------------|-----------------|---------------------------|---------------------------|
|             | (pmol/g tissue) | <i>Pdc</i> <sup>+/+</sup> | <i>Pdc</i> <sup>-/-</sup> |
| Whole brain | Norepinephrine  | 643 ± 23                  | 631 ± 19                  |
|             | DHPG            | 41.2 ± 1.9                | 42.2 ± 1.8                |
|             | Normetanephrine | 83.0 ± 12.1               | 79.3 ± 8.1                |
| Brain stem  | Norepinephrine  | 4868 ± 206                | 5131 ± 118                |
|             | Normetanephrine | 331 ± 51                  | 348 ± 44                  |

**Supplemental Table 3 | Map of variation found in the human *PDC* gene.** The table displays SNPs found in *PDC* gene from direct sequencing. Underlined SNPs are previously known SNPs and non-underlined SNPs were found through sequencing. SNPs marked by an asterisk were genotyped in the full FC and AA populations.

| SNP                | Position         | Population   | MAF                    | PDC Region      |
|--------------------|------------------|--------------|------------------------|-----------------|
| ss79332289         | 184676382        | FC/AA        | FC:0.12,AA:0.06        |                 |
| ss79332318         | 184676521        | AA           | 0.03                   |                 |
| ss79332290         | 184677635        | FC           | 0.08                   |                 |
| ss79332320         | 184678535        | AA           | 0.04                   |                 |
| <u>rs1929095*</u>  | <u>184679344</u> | <u>FC/AA</u> | <u>FC:0.13,AA:0.44</u> | <u>3' UTR</u>   |
| ss79332321         | 184679672        | AA           | 0.19                   | 3' UTR          |
| <u>rs11812050</u>  | <u>184680337</u> | <u>FC/AA</u> | <u>FC:0.1,AA:0.04</u>  | <u>Intronic</u> |
| ss79332323         | 184680698        | AA           | 0.32                   | Intronic        |
| ss79332292         | 184681408        | FC           | 0.02                   | Intronic        |
| ss79332324         | 184681457        | AA           | 0.01                   | Intronic        |
| ss79332293         | 184682446        | FC           | 0.08                   | Intronic        |
| ss79332295         | 184683662        | FC/AA        | FC:0.5,AA:0.44         | Intronic        |
| <u>rs6659683</u>   | <u>184684073</u> | <u>FC/AA</u> | <u>FC:0.27,AA:0.49</u> | <u>Intronic</u> |
| <u>rs6672638</u>   | <u>184684107</u> | <u>FC/AA</u> | <u>FC:0.08,AA:0.27</u> | <u>Intronic</u> |
| <u>rs6672836*</u>  | <u>184684320</u> | <u>FC/AA</u> | <u>FC:0.26,AA:0.49</u> | <u>Intronic</u> |
| ss79332327         | 184684858        | AA           | 0.04                   | Intronic        |
| ss79332328         | 184685012        | AA           | 0.26                   | Intronic        |
| <u>rs12407957</u>  | <u>184685223</u> | <u>FC/AA</u> | <u>FC:0.13,AA:0.45</u> | <u>5' UTR</u>   |
| <u>rs10911863</u>  | <u>184688299</u> | <u>FC/AA</u> | <u>FC:0.2,AA:0.39</u>  | <u>Intronic</u> |
| ss79332330         | 184688304        | AA           | 0.03                   | Intronic        |
| <u>rs12402521*</u> | <u>184689144</u> | <u>FC/AA</u> | <u>FC:0.26,AA:0.49</u> | <u>Intronic</u> |
| <u>rs12239322</u>  | <u>184689437</u> | <u>FC/AA</u> | <u>FC:0.01,AA:0.2</u>  | <u>Intronic</u> |
| ss79332298         | 184689927        | FC           | 0.12                   | Intronic        |
| ss79332331         | 184690705        | AA           | 0.14                   | Intronic        |
| <u>rs10911864</u>  | <u>184692078</u> | <u>FC/AA</u> | <u>FC:0.06,AA:0.1</u>  | <u>Intronic</u> |

|                   |                  |              |                        |                 |
|-------------------|------------------|--------------|------------------------|-----------------|
| <u>rs10798041</u> | <u>184692149</u> | <u>FC/AA</u> | <u>FC:0.17,AA:0.19</u> | <u>Intronic</u> |
| <u>rs10911866</u> | <u>184692409</u> | <u>FC</u>    | <u>0.15</u>            | <u>Intronic</u> |
| ss79332299        | 184693528        | FC/AA        | FC:0.5,AA:0.42         | Intronic        |
| ss79332333        | 184694101        | AA           | 0.4                    | Intronic        |
| <u>rs4007511</u>  | <u>184694184</u> | <u>AA</u>    | <u>0.34</u>            | <u>Intronic</u> |
| ss79332301        | 184697699        | FC/AA        | FC:0.05,AA:0.04        |                 |
| <u>rs1799957*</u> | <u>184697968</u> | <u>FC/AA</u> | <u>FC:0.26,AA:0.48</u> | -               |
| ss79332303        | 184698407        | FC           | 0.19                   |                 |
| ss79332304        | 184698744        | FC           | 0.04                   |                 |
| ss79332306        | 184699208        | FC           | 0.05                   |                 |
| ss79332334        | 184699677        | AA           | 0.01                   |                 |
| ss79332336        | 184699810        | AA           | 0.01                   |                 |
| ss79332307        | 184699852        | FC           | 0.18                   |                 |
| ss79332339        | 184699990        | AA           | 0.01                   |                 |
| ss79332309        | 184700051        | FC/AA        | FC:0.2,AA:0.07         |                 |
| ss79332310        | 184700204        | FC/AA        | FC:0.08,AA:0.1         |                 |
| ss79332312        | 184700244        | FC           | 0.01                   |                 |
| ss79332314        | 184700282        | FC           | 0.02                   |                 |
| <u>rs3119331</u>  | <u>184701141</u> | <u>FC/AA</u> | <u>FC:0.18,AA:0.02</u> | -               |
| ss79332315        | 184701516        | FC/AA        | FC:0.08,AA:0.04        |                 |
| <u>rs16825403</u> | <u>184701847</u> | <u>FC/AA</u> | <u>FC:0.11,AA:0.17</u> | -               |
| ss79332340        | 184701869        | AA           | 0.04                   |                 |
| ss79332342        | 184701889        | AA           | 0.17                   |                 |
| ss79332317        | 184701897        | FC/AA        | FC:0.03,AA:0.04        |                 |

**Supplemental Table 4 | Primer sequences used for determination of gene expression by quantitative real-time PCR.** Abbreviations: *Pdc*, phosducin; *Ptgs2*, cyclooxygenase 2; *Actb*,  $\beta$ -actin; *Srp14*, signal recognition particle 14; *Gapdh*, glyceraldehyde-3-phosphate dehydrogenase; *Ppib*, peptidylprolyl isomerase B; *Adrb1*,  $\beta_1$ -adrenoceptor; *Adrb2*,  $\beta_2$ -adrenoceptor; *Adra1a,b,d*,  $\alpha_{1A,B,D}$ -adrenoceptor; *Myh7*,  $\beta$ -myosin heavy chain; *Rps29*, ribosomal protein S29; s, sense primer; as, antisense primer.

| Gene                       | Primer [5' → 3']                                         | Product size (bp) |
|----------------------------|----------------------------------------------------------|-------------------|
| <i>Pdc</i>                 | s: CACCCAGCAAGAAGGAAATC<br>as: ATGAGTTCATATTCTTGAATGCTCA | 106               |
| <i>Pdc</i><br>(nested PCR) | s: CTCAGACAAATGTCCTCTCC<br>as: CTGCTCATTCTTTCTTTTGAG     | 56                |
| <i>Ptgs2</i>               | s: TCCCTGAAGCCGTACACATCA<br>as: TGGACGAGGTTTTTCCACCA     | 132               |
| <i>Actb</i>                | s: TCCATCATGAAGTGTGACGT<br>as: GAGCAATGATCTTGATCTTCAT    | 154               |
| <i>Srp14</i>               | s: TCGAGCCTGCAGAAAACAAG<br>as: TTCTTCAGCCCGTCCATGT       | 142               |
| <i>Gapdh</i>               | s: ATGGCCTTCCGTGTTCTTA<br>as: ATGCCTGCTTCACCACCTT        | 106               |
| <i>Ppib</i>                | s: TTCCATCGTGTCATCAAGGAC<br>as: GAAGCGCTCACCATAGATGCT    | 93                |

|               |                                                            |     |
|---------------|------------------------------------------------------------|-----|
| <i>Adrb1</i>  | s: CGCCATCACGTCGCCCTT<br>as: GCAGCGGCGCGCTTCGT             | 154 |
| <i>Adrb2</i>  | s: GAGCGACTACAAACCGTCA<br>as: TCGATGCTGGCTGTGACGCA         | 182 |
| <i>Adra1a</i> | s: ATGTACTGTCGAGTCTACGTGGTAG<br>as: TGGATACGGAGCGTCACTTGCT | 105 |
| <i>Adra1b</i> | s: GACACCGGCCACAACACATCA<br>as: GCAGTGTGGAGTTGCTCGAG       | 97  |
| <i>Adra1d</i> | s: AGCACCACGCGCAGCCTCGA<br>as: GAGCGAGCTGCGCAAGGTGT        | 155 |
| <i>Myh7</i>   | s: ACTGTCAACACTAAGAGGGTCA<br>as: TTGGATGATTTGATCTTCCAGGG   | 114 |
| <i>Rps29</i>  | s: ATGGGTCACCAGCAGCTCTA<br>as: AGCCTATGTCCTTCGCGTACT       | 155 |
